# Supplementary material for: Transition cow health and management in pasture-based dairy herds: A farmers’ survey
Source: PubMed Central journal article supplement (PMC11651598; doi:10.1371/journal.pone.0314987), 2024-12-17
Supplement: pone.0314987.s007.pdf [file pone.0314987.s007.pdf]

# PLOS ONE

## Transition cow health and management in pasture-based dairy herds: a farmers' survey --Manuscript Draft--

|                                |                                                                                                                                                                                                                                                                                                                                                                                                                                                                                                                                                                                                                                                                                                                                                                                                                                                                                                                                                                                                                                                                                                                                                                                                                                                                                                                                                                                                                                                                                                                                                                                                                                                                                                                                                                                                                                                                                                                                                                                                                                                            |
|--------------------------------|------------------------------------------------------------------------------------------------------------------------------------------------------------------------------------------------------------------------------------------------------------------------------------------------------------------------------------------------------------------------------------------------------------------------------------------------------------------------------------------------------------------------------------------------------------------------------------------------------------------------------------------------------------------------------------------------------------------------------------------------------------------------------------------------------------------------------------------------------------------------------------------------------------------------------------------------------------------------------------------------------------------------------------------------------------------------------------------------------------------------------------------------------------------------------------------------------------------------------------------------------------------------------------------------------------------------------------------------------------------------------------------------------------------------------------------------------------------------------------------------------------------------------------------------------------------------------------------------------------------------------------------------------------------------------------------------------------------------------------------------------------------------------------------------------------------------------------------------------------------------------------------------------------------------------------------------------------------------------------------------------------------------------------------------------------|
| <b>Manuscript Number:</b>      | PONE-D-24-31981                                                                                                                                                                                                                                                                                                                                                                                                                                                                                                                                                                                                                                                                                                                                                                                                                                                                                                                                                                                                                                                                                                                                                                                                                                                                                                                                                                                                                                                                                                                                                                                                                                                                                                                                                                                                                                                                                                                                                                                                                                            |
| <b>Article Type:</b>           | Research Article                                                                                                                                                                                                                                                                                                                                                                                                                                                                                                                                                                                                                                                                                                                                                                                                                                                                                                                                                                                                                                                                                                                                                                                                                                                                                                                                                                                                                                                                                                                                                                                                                                                                                                                                                                                                                                                                                                                                                                                                                                           |
| <b>Full Title:</b>             | Transition cow health and management in pasture-based dairy herds: a farmers' survey                                                                                                                                                                                                                                                                                                                                                                                                                                                                                                                                                                                                                                                                                                                                                                                                                                                                                                                                                                                                                                                                                                                                                                                                                                                                                                                                                                                                                                                                                                                                                                                                                                                                                                                                                                                                                                                                                                                                                                       |
| <b>Short Title:</b>            | Transition cow health and management in pasture-based dairy herds: a farmers' survey                                                                                                                                                                                                                                                                                                                                                                                                                                                                                                                                                                                                                                                                                                                                                                                                                                                                                                                                                                                                                                                                                                                                                                                                                                                                                                                                                                                                                                                                                                                                                                                                                                                                                                                                                                                                                                                                                                                                                                       |
| <b>Corresponding Author:</b>   | Ainhoa Valldecabres, Ph.D.<br>Teagasc Animal and Grassland Research and Innovation Centre<br>Fermoy, IRELAND                                                                                                                                                                                                                                                                                                                                                                                                                                                                                                                                                                                                                                                                                                                                                                                                                                                                                                                                                                                                                                                                                                                                                                                                                                                                                                                                                                                                                                                                                                                                                                                                                                                                                                                                                                                                                                                                                                                                               |
| <b>Keywords:</b>               | Fresh period; dry period; disease incidence; milk fever; management strategies; cow; dairy cow; grazing cow; hypocalcemia; subclinical hypocalcemia                                                                                                                                                                                                                                                                                                                                                                                                                                                                                                                                                                                                                                                                                                                                                                                                                                                                                                                                                                                                                                                                                                                                                                                                                                                                                                                                                                                                                                                                                                                                                                                                                                                                                                                                                                                                                                                                                                        |
| <b>Abstract:</b>               | <p>Seasonal-calving pasture-based systems characterize Irish dairy production. Compared to other grazing systems, dry cows are housed and offered a diet dominated by grass silage, providing unique opportunities for transition cow management. This study aimed to describe transition period disease incidence and management strategies reported by farmers and to evaluate their associations with herd size and calving pattern to inform and guide research activities and national advisory. An online survey distributed amongst 3,899 Teagasc Technical Dairy Advisory clients yielded 525 responses suitable for analysis. Disease incidence was reportedly highest in cows within 3 weeks post-calving (58%), at the end of the calving season (48%) and multiparous cows (52%). Twenty-three percent of respondents reported to treat &gt;3% of their herd for milk fever. Regarding transition cow management, dry cow body condition monitoring (73%), dry cow mineral supplementation (61%), and Ca supplementation at calving (61%) were the most commonly reported. Other dry cow management strategies for milk fever prevention supported by research in other production systems were not commonly reported (low K [20%] and negative dietary cation-anion difference diet [6%]). Compared to spring-calving, the odds of reporting to provide feeds besides grass silage to dry cows were higher (OR = 2.5) while the odds of reporting to implement once-a-day milking (OR = 0.16) were lower for farmers from split-calving herds. The odds of reporting to keep records of antibiotic treatment for milk fever were higher (OR = 3.20) for farmers from small compared to large herds. In conclusion, our results suggest that milk fever is a transition cow health concern in Irish dairy farms. Efforts should be devoted to enhance farmers' uptake of existing research-supported prophylactic strategies for milk fever and to optimize commonly reported management strategies in the Irish dairy production context.</p> |
| <b>Order of Authors:</b>       | <p>Louise Horan</p> <p>Joseph Patton</p> <p>Conor G McAloon</p> <p>Ángel García-Muñoz</p> <p>Áine Regan</p> <p>John F Mee</p> <p>Ainhoa Valldecabres, Ph.D.</p>                                                                                                                                                                                                                                                                                                                                                                                                                                                                                                                                                                                                                                                                                                                                                                                                                                                                                                                                                                                                                                                                                                                                                                                                                                                                                                                                                                                                                                                                                                                                                                                                                                                                                                                                                                                                                                                                                            |
| <b>Additional Information:</b> |                                                                                                                                                                                                                                                                                                                                                                                                                                                                                                                                                                                                                                                                                                                                                                                                                                                                                                                                                                                                                                                                                                                                                                                                                                                                                                                                                                                                                                                                                                                                                                                                                                                                                                                                                                                                                                                                                                                                                                                                                                                            |
| <b>Question</b>                | <b>Response</b>                                                                                                                                                                                                                                                                                                                                                                                                                                                                                                                                                                                                                                                                                                                                                                                                                                                                                                                                                                                                                                                                                                                                                                                                                                                                                                                                                                                                                                                                                                                                                                                                                                                                                                                                                                                                                                                                                                                                                                                                                                            |
| <b>Financial Disclosure</b>    | The author(s) received no specific funding for this work.                                                                                                                                                                                                                                                                                                                                                                                                                                                                                                                                                                                                                                                                                                                                                                                                                                                                                                                                                                                                                                                                                                                                                                                                                                                                                                                                                                                                                                                                                                                                                                                                                                                                                                                                                                                                                                                                                                                                                                                                  |

Enter a financial disclosure statement that describes the sources of funding for the work included in this submission. Review the [submission guidelines](#) for detailed requirements. View published research articles from [PLOS ONE](#) for specific examples.

This statement is required for submission and **will appear in the published article** if the submission is accepted. Please make sure it is accurate.

#### Funded studies

Enter a statement with the following details:

- Initials of the authors who received each award
- Grant numbers awarded to each author
- The full name of each funder
- URL of each funder website
- Did the sponsors or funders play any role in the study design, data collection and analysis, decision to publish, or preparation of the manuscript?

Did you receive funding for this work?

#### Competing Interests

Use the instructions below to enter a competing interest statement for this submission. On behalf of all authors, disclose any [competing interests](#) that could be perceived to bias this work—acknowledging all financial support and any other relevant financial or non-financial competing interests.

This statement is **required** for submission and **will appear in the published article** if the submission is accepted. Please make sure it is accurate and that any funding sources listed in your Funding Information later in the submission form are also declared in your Financial Disclosure statement.

View published research articles from

The authors have declared that no competing interests exist.

[PLOS ONE](#) for specific examples.

**NO authors have competing interests**

Enter: *The authors have declared that no competing interests exist.*

**Authors with competing interests**

Enter competing interest details beginning with this statement:

*I have read the journal's policy and the authors of this manuscript have the following competing interests: [insert competing interests here]*

\* typeset

**Ethics Statement**

Enter an ethics statement for this submission. This statement is required if the study involved:

- Human participants
- Human specimens or tissue
- Vertebrate animals or cephalopods
- Vertebrate embryos or tissues
- Field research

Write "N/A" if the submission does not require an ethics statement.

General guidance is provided below. Consult the [submission guidelines](#) for detailed instructions. **Make sure that all information entered here is included in the Methods section of the manuscript.**

The present study was approved by the University College Dublin Human Research Ethics Committee – Sciences (LS-LR-22-180; HREC-LS). A tick the box question at the beginning of the survey was used to obtain written consent from respondents to use data provided in the survey and that available in their ICBF profiles for the purpose of this study.

Animals were not used in the present study. Therefore, no ethical approval regarding the use of animals was sought in this study.

**Format for specific study types**

**Human Subject Research (involving human participants and/or tissue)**

- Give the name of the institutional review board or ethics committee that approved the study
- Include the approval number and/or a statement indicating approval of this research
- Indicate the form of consent obtained (written/oral) or the reason that consent was not obtained (e.g. the data were analyzed anonymously)

**Animal Research (involving vertebrate animals, embryos or tissues)**

- Provide the name of the Institutional Animal Care and Use Committee (IACUC) or other relevant ethics board that reviewed the study protocol, and indicate whether they approved this research or granted a formal waiver of ethical approval
- Include an approval number if one was obtained
- If the study involved *non-human primates*, add *additional details* about animal welfare and steps taken to ameliorate suffering
- If anesthesia, euthanasia, or any kind of animal sacrifice is part of the study, include briefly which substances and/or methods were applied

**Field Research**

Include the following details if this study involves the collection of plant, animal, or other materials from a natural setting:

- Field permit number
- Name of the institution or relevant body that granted permission

**Data Availability**

Authors are required to make all data underlying the findings described fully available, without restriction, and from the time of publication. PLOS allows rare exceptions to address legal and ethical concerns. See the [PLOS Data Policy](#) and [FAQ](#) for detailed information.

Yes - all data are fully available without restriction

A Data Availability Statement describing where the data can be found is required at submission. Your answers to this question constitute the Data Availability Statement and **will be published in the article**, if accepted.

**Important:** Stating 'data available on request from the author' is not sufficient. If your data are only available upon request, select 'No' for the first question and explain your exceptional situation in the text box.

Do the authors confirm that all data underlying the findings described in their manuscript are fully available without restriction?

**Describe where the data may be found in full sentences. If you are copying our sample text, replace any instances of XXX with the appropriate details.**

- If the data are **held or will be held in a public repository**, include URLs, accession numbers or DOIs. If this information will only be available after acceptance, indicate this by ticking the box below. For example: *All XXX files are available from the XXX database (accession number(s) XXX, XXX).*
- If the data are all contained **within the manuscript and/or Supporting Information files**, enter the following:  
*All relevant data are within the manuscript and its Supporting Information files.*
- If neither of these applies but you are able to provide **details of access elsewhere**, with or without limitations, please do so. For example:

*Data cannot be shared publicly because of [XXX]. Data are available from the XXX Institutional Data Access / Ethics Committee (contact via XXX) for researchers who meet the criteria for access to confidential data.*

*The data underlying the results presented in the study are available from (include the name of the third party*

All relevant data are within the manuscript and its Supporting Information files.

*and contact information or URL).*

- This text is appropriate if the data are owned by a third party and authors do not have permission to share the data.

\* typeset

Additional data availability information:

1                   **Short title: Pasture-based transition period survey**

2                   **Transition cow health and management in pasture-based**  
3                   **dairy herds: a farmers' survey**

4  
5    Louise Horan<sup>1,2</sup>, Joseph Patton<sup>1</sup>, Conor G. McAloon<sup>2</sup>, Ángel García-Muñoz<sup>3</sup>, Áine Regan<sup>4</sup>, John  
6    F. Mee<sup>1</sup> and, Ainhoa Valldecabres<sup>1\*</sup>

7  
8  
9    <sup>1</sup>Animal and Grassland Research and Innovation Centre, Teagasc Moorepark, Fermoy, Co.  
10    Cork, Ireland

11  
12   <sup>2</sup>School of Veterinary Medicine, University College Dublin, Belfield, Dublin 4, Ireland

13  
14   <sup>3</sup>Facultad de Veterinaria, Universidad Cardenal Herrera-CEU, CEU Universities, Valencia, Spain

15  
16   <sup>4</sup>Department of Agri-food Business & Spatial Analysis, Teagasc Mellows Campus, Athenry, Co.  
17    Galway, Ireland

18  
19  
20    \* Corresponding author

21    E-mail: [Ainhoa.Valldecabres@teagasc.ie](mailto:Ainhoa.Valldecabres@teagasc.ie) (AV)

22

## 23 Abstract

24 Seasonal-calving pasture-based systems characterize Irish dairy production. Compared to  
25 other grazing systems, dry cows are housed and offered a diet dominated by grass silage,  
26 providing unique opportunities for transition cow management. This study aimed to describe  
27 transition period disease incidence and management strategies reported by farmers and to  
28 evaluate their associations with herd size and calving pattern to inform and guide research  
29 activities and national advisory. An online survey distributed amongst 3,899 Teagasc Technical  
30 Dairy Advisory clients yielded 525 responses suitable for analysis. Disease incidence was  
31 reportedly highest in cows within 3 weeks post-calving (58%), at the end of the calving season  
32 (48%) and multiparous cows (52%). Twenty-three percent of respondents reported to treat  
33 >3% of their herd for milk fever. Regarding transition cow management, dry cow body  
34 condition monitoring (73%), dry cow mineral supplementation (61%), and Ca  
35 supplementation at calving (61%) were the most commonly reported. Other dry cow  
36 management strategies for milk fever prevention supported by research in other production  
37 systems were not commonly reported (low K [20%] and negative dietary cation-anion  
38 difference diet [6%]). Compared to spring-calving, the odds of reporting to provide feeds  
39 besides grass silage to dry cows were higher (OR = 2.5) while the odds of reporting to  
40 implement once-a-day milking (OR = 0.16) were lower for farmers from split-calving herds.  
41 The odds of reporting to keep records of antibiotic treatment for milk fever were higher (OR  
42 = 3.20) for farmers from small compared to large herds. In conclusion, our results suggest that  
43 milk fever is a transition cow health concern in Irish dairy farms. Efforts should be devoted to  
44 enhance farmers' uptake of existing research-supported prophylactic strategies for milk fever



45 and to optimize commonly reported management strategies in the Irish dairy production  
46 context.

## 47 **Introduction**

48 The transition period, encompassing the few weeks before and after calving in dairy cows has  
49 been a focus of research **during the last decades** [1–3]. It is not surprising given the range of  
50 physical (physiological, immunological and metabolic) and environmental changes which  
51 challenge cows' **homeostasis** and often turn into disease, ultimately impairing cows' welfare  
52 and production performance [4–6]. Despite the large amount of research conducted in the  
53 transition period and management strategies for its optimization, it remains a challenge to  
54 dairy production. The lack of a single definition for the transition period, as well as varying  
55 farmers' attitudes towards management and veterinarian involvement have been described  
56 as barriers to transition cow health and management improvement by a study involving  
57 Canadian farmers and veterinarians [7]. **A lack of focussed advice being given to farmers by**  
58 **advisors (subjects of the interviews) due to a perceived lack of interest by the farmer may also**  
59 **restrain the improvement on transition cow health and management as described by Roche**  
60 [8].

61 While the challenges faced by housed and grazing cows during the transition period may be  
62 similar, system-level differences determine the management possibilities and the occurrence  
63 of specific diseases for these two production systems [8,9]. Furthermore, there is wide  
64 variability among pasture-based dairy production systems potentially leading to problems  
65 unique to each system [8]. In Ireland, dairy herds are predominantly intensive spring-calving  
66 herds in which cows graze the majority of their lactational feed requirements and are housed  
67 and fed conserved forages during the dry period in the winter months [9,10]. **The combination**

68 of grazing and confinement differentiates Ireland's from other pasture-based dairy  
69 production systems, and provides unique opportunities for transition cow management.  
70 Nevertheless, limited transition cow health research has been conducted in this context and  
71 there is a lack of national-level disease incidence and management data which is needed to  
72 characterize and benchmark against current scientific recommendations for transition cow  
73 health and management strategies implemented in this production system.  
74 Quantitative surveys and cross-sectional observational studies have been used to describe  
75 transition cow disease incidence and management strategies in other dairy production  
76 systems [10–12]. However, to the best of our knowledge, the only available survey associated  
77 with the Irish dairy cow transition period focuses on calving and colostrum management  
78 briefly describing pre-calving nutritional management in Irish dairy herds [13]. Therefore, the  
79 purpose of this study was to describe farmers' reported disease incidence and management  
80 strategies implemented during the transition period, and to quantify their associations with  
81 herd size and calving pattern to inform and guide research and advisory activities in transition  
82 cow health and management in Irish dairy farms.

## 83 **Materials and methods**

84 The present study was approved by the University College Dublin Human Research Ethics  
85 Committee – Sciences (LS-LR-22-180; HREC-LS). A tick the box question at the beginning of  
86 the survey was used to obtain written consent from respondents to use data provided in the  
87 survey and that available in their ICBF profiles for the purpose of this study.

## 88 **Study population**

89 Teagasc Technical Dairy Advisory clients were the target population of this observational  
90 study. Teagasc is the Agriculture and Food Development Authority in the Republic of Ireland  
91 and is composed of three main pillars: research, education and advisory/extension. Irish  
92 farmers voluntarily **join the advisory service** which aims at disseminating independent,  
93 research-driven technical advice and support to clients. This is achieved by means of offering  
94 monthly farmer discussion groups, regular on-farm consultations, and provision of decision  
95 support packages and printed/audio material. At the time of the study, a total of 3,899  
96 nationwide Irish dairy farmers were **members** of the Teagasc Technical Dairy Advisory services  
97 and had provided consent for being contacted for research purposes; this represents 25.5%  
98 of Ireland's dairy farmers in 2022 [14]. The wider dairy farming community could not be  
99 targeted in this study due to limitations on personal data access for the researchers.

## 100 **Survey design and distribution**

101 An online survey was designed to collect information on Irish dairy farmers' transition period  
102 perception, disease incidence and implemented management strategies. For the purpose of  
103 this study, focus is given to the disease incidence and implemented management strategies  
104 survey sections. Questions were modified according to Teagasc dairy advisors' suggestions,  
105 and the survey was pilot tested on five people who were either dairy farmers or dairy farm  
106 managers to assess its effectiveness and estimate the time to completion. The survey was  
107 administered using SurveyMonkey (SurveyMonkey Inc., Palo Alto, CA). At the beginning of the  
108 survey the transition period was defined as "**late dry (late pregnancy if primiparous) to early**  
109 **lactation period**" to provide context to respondents. The survey included 18 questions;  
110 questions were a mixture of closed (multiple choice; n = 14), open-ended (n = 3) and multiple

111 choice with a comment field to allow for providing a not listed response (n = 2). The first  
112 question asked respondents to confirm consent to their data from the survey and from their  
113 Irish Cattle Breeding Federation (ICBF) profile being used in this study by ticking a box. The  
114 second question was for the purpose of data extraction from the ICBF database and was  
115 followed by two questions relating to interest on partaking in a subsequent on-farm study.  
116 Afterwards, three questions gathered farmers opinions and perception of the transition  
117 period, and the remaining questions (n = 11) gathered information to meet the objectives of  
118 this study regarding respondent demographics (n = 2), disease incidence (n = 6) and  
119 management strategies (n = 4; S1 Table).

120 The link to the online survey along with an explanatory message were distributed by text  
121 message to Teagasc technical dairy advisory clients (n = 3,899) on the 28<sup>th</sup> September 2022.  
122 A reminder text was sent on the 4<sup>th</sup> October 2022 and the survey was closed for responses 12  
123 days after its opening.

## 124 **Data processing and analysis**

125 Survey responses were exported to Excel (Excel 2013; Microsoft Corp.) for analysis. Four  
126 respondents answered the survey twice; the survey response with the highest level of  
127 completion or that provided in the first attempt, if both responses had the same level of  
128 completion, were used in the study. Seventy-two respondents skipped every survey question  
129 after providing consent for data usage for research purposes and were not included in the  
130 analysis. Responses were checked for signs of bot activity before data analysis by checking  
131 timestamps to ensure no respondents completed the survey abnormally fast and by checking  
132 responses for any illogical or repeated statements [15].

133 Answers in the open-ended comment fields of some of the multiple choice questions were  
134 placed into already existing or new categories within the question for data analysis and  
135 summarization. Similarly, some answers to the same question were grouped; given the  
136 prevalent inclusion of Mg in pre-made mineral mixes used in Ireland (Reardon et al.,  
137 unpublished), responses reporting the provision of dry or fresh cow minerals were combined  
138 with those reporting Mg supplementation to dry or fresh cows in respective categories named  
139 “Mg and/or other mineral supplementation”. And “high-risk cows Ca supplementation at  
140 calving” and “all cows routine Ca supplementation at calving” were combined into “Ca  
141 supplementation at calving”. Where respondents had the option of selecting an answer or  
142 not, the selection of the answer was coded as “yes” and the lack of selection was coded as  
143 “no”; consequently, answers such as “I don’t keep records of this disease” and “no, I don’t get  
144 advice from any of the above” were no longer considered in the analysis as these were already  
145 regarded in the above described code. Given the systematic provision of concentrates during  
146 milking to lactating cows [16], responses reporting the provision of feeds other than silage to  
147 fresh cows were not considered in this study. Answers to reported herd disease treatment  
148 incidence were summarized as “above” or “below” previously described herd alarm levels  
149 [17]; where the described herd alarm level did not coincide with the answer options specified  
150 in the survey, the closest category was referred instead. Only diseases with at least 20% of  
151 reported treatments at each side of the herd alarm threshold were evaluated for their  
152 association with herd size and calving pattern.

153 Respondents were classified by herd size using information from the Teagasc advisory and  
154 ICBF databases, categories were defined based on the Irish national dairy herd average size  
155 (93 cows; [16]) as large (>150 cows), above average (100 – 150 cows), average (60 – 100 cows),  
156 or small (<60 cows); herd size information was obtained for 510 of the respondents.

157 Respondents were also classified by calving pattern using the information provided in the  
158 survey (spring-calving only, autumn-calving only, split-calving, or all year round calving) with  
159 only the two most commonly reported calving patterns being used in analysis (spring- and  
160 split-calving). Further herd-level descriptive information (305-day milk yield and calving  
161 interval) was obtained from the ICBF database.

162 Summary statistics were produced using the MEANS and FREQ procedures of SAS (Version  
163 9.4; SAS Institute Inc., Cary, NC). Univariate logistic regression models were used to evaluate  
164 the association between reported disease treatment incidence and implemented  
165 management strategies with herd size or calving pattern using the GENMOD procedure of  
166 SAS. Statistical models included the logit link function and the Tukey-Kramer adjustment to  
167 account for multiple pairwise comparisons (herd size models). And the association between  
168 reported disease treatment incidence and herd size or calving pattern was only evaluated if  
169 the proportion of respondents above or below the respective herd alarm level was at least  
170 20%. Reported odds ratio (OR) represent the ratio for the odds of “yes” vs. “no” answer to  
171 each question for respondents belonging to different herd size or calving pattern categories,  
172 taking as a reference the most prevalent categories (large herd size and spring-calving). Only  
173 OR at  $P \leq 0.05$  for the comparison are reported in the manuscript. Considering each  
174 respondent did not answer every question of the survey, the number of respondents per  
175 question (and answer) is provided as appropriate.

## 176 **Results**

177 A total of 601 survey responses were received between 28<sup>th</sup> September and 10<sup>th</sup> October  
178 (2022); yielding a survey response rate of 15.4%. Excluding the duplicated (n = 4) and the  
179 blank responses (n = 72), 525 responses were available for analyses. Geographical distribution

180 by county of survey respondents providing a valid Eircode is presented in Fig 1. On average,  
181 it took respondents 14 minutes to complete the survey. Responses are reported for all  
182 respondents (n = 525), by herd size (large: n = 154, above average: n = 134, average: n = 148,  
183 or small: n = 74) or calving pattern for the two most common calving systems (spring-calving:  
184 n = 439, or split-calving: n = 67). Denominator values are shown for each question and answer;  
185 lower denominator values indicate questions or answers skipped by some respondents.

186 **Fig 1. Geographical distribution by county of survey respondents across the Republic of**  
187 **Ireland (n = 408 respondents with valid Eircodes).**

## 188 **Study population**

189 Overall, respondents median herd size was 110 cows (interquartile range [IQR] = 78 – 162  
190 cows) and mean herd size was 135 cows. Respondents mainly had spring-calving herds  
191 (84.3%; 439/521) whilst the remainder operated split-calving (12.9%; 67/521), all year round  
192 calving (2.3%; 12/521), or autumn-calving (0.6%; 3/521) herds. For farmers with an active ICBF  
193 account with relevant data available, mean 305-day milk yield was 6,857 L (IQR = 6,111 –  
194 7,162 L; n = 237) and mean calving interval was 377 days (IQR = 367 – 381 days; n = 323) for  
195 2022. Based on the amount of bought-in feed per cow per year, farmers classified themselves  
196 as high-input (>1 tonne of bought-in feed/cow; 51.6% [268/519]), low-input ( $\leq$ 1 tonne of  
197 bought-in feed/cow; 47.8% [248/519]), or zero-grazed grass fed all of the time (0.6%; 3/519).  
198 Herd descriptions by herd size and calving pattern are provided in S2 Table.

## 199 **Disease incidence**

200 Incidence of disease was reported to be highest in freshly calved cows (first 3 weeks after  
201 calving; 57.6%; 299/519) and in multiparous cows (51.9%; 266/513). Respondents reported  
202 that disease incidence was highest among cows calving at the end of the block calving season

203 (with late calvers; 48.0%; 245/510). However, a substantial cohort of respondents, indicated  
 204 that problems arise during all of the calving season regardless of the stage (41.4%; 211/510)  
 205 and that **disease affects both, primiparous and multiparous cows** (43.1%; 221/513; Fig 2). The  
 206 complete distribution of reported disease incidence according to stage of calving season,  
 207 stage of lactation and parity by herd size and calving pattern is presented in S3 Table. Overall  
 208 most farmers reported **to** treat  $\leq 3\%$  of their herd for milk fever (77.0%; 401/521) and retained  
 209 **placenta** (86.9%; 450/518), and  $<1\%$  of their herd for grass tetany (82.6%; 419/507), ketosis  
 210 (72.7%; 368/506), displaced abomasum and/or digestive problems (71.5%; 373/522), and  
 211 metritis (52.4%; 263/502) on an ‘average’ year on their farm. Table 1 shows the complete  
 212 distribution of reported proportion of cows treated by condition, herd size and calving  
 213 pattern. The odds of farmers from split-calving herds reporting to treat  $>3\%$  of the herd for  
 214 milk fever were 1.8 times those of farmers from spring-calving herds (OR [95% CI] = 1.78 [1.02  
 215 – 3.12];  $P = 0.042$ ). The association between other diseases reported treatments incidence  
 216 and herd size or calving pattern was not evaluated given the limited number of farmers  
 217 reporting to treat a proportion of animals above the herd alarm levels described by Lean and  
 218 DeGaris [17].

219 **Fig 2. Reported distribution of highest disease incidence by cow parity (A; n = 513), stage**  
 220 **of lactation (B; n = 520) and stage of calving season (C; n = 510) for all survey respondents.**

221 **Table 1.** Reported proportion of **respondents’ herd** treated for health conditions on an  
 222 “average” year (% of respondents)

| Condition and treated cows | Herd size <sup>a</sup> |               |         |        | Herd calving pattern <sup>a</sup> |               |         |
|----------------------------|------------------------|---------------|---------|--------|-----------------------------------|---------------|---------|
|                            | Large                  | Above average | Average | Small  | Spring-calving                    | Split-calving | All     |
| Milk fever                 | n = 154                | n = 133       | n = 146 | n = 74 | n = 437                           | n = 67        | n = 521 |
| >10%                       | 2.0                    | 1.5           | 2.7     | 1.4    | 1.8                               | 3.0           | 1.9     |
| 7 to 10%                   | 4.6                    | 5.3           | 2.1     | 1.4    | 3.7                               | 4.5           | 3.8     |
| 4 to 6%                    | 14.3                   | 18.8          | 15.1    | 24.3   | 16.0                              | 25.4          | 17.3    |



|                    |         |         |         |        |         |        |         |
|--------------------|---------|---------|---------|--------|---------|--------|---------|
| 1 to 3%            | 55.2    | 48.9    | 48.0    | 33.8   | 49.0    | 43.3   | 48.4    |
| <1%                | 24.0    | 25.6    | 32.2    | 39.2   | 29.5    | 23.9   | 28.6    |
| Retained placenta  | n = 154 | n = 133 | n = 146 | n = 71 | n = 435 | n = 67 | n = 518 |
| >10%               | 0.0     | 1.5     | 0.0     | 0.0    | 0.5     | 0.0    | 0.4     |
| 7 to 10%           | 2.6     | 2.3     | 2.1     | 0.0    | 2.3     | 1.5    | 2.1     |
| 4 to 6%            | 11.0    | 10.5    | 13.7    | 5.6    | 10.1    | 13.4   | 10.6    |
| 1 to 3%            | 60.4    | 54.1    | 50.0    | 56.3   | 53.8    | 64.2   | 55.6    |
| <1%                | 26.0    | 31.6    | 34.3    | 38.0   | 33.3    | 20.9   | 31.3    |
| Metritis           | n = 148 | n = 127 | n = 141 | n = 72 | n = 424 | n = 63 | n = 502 |
| >10%               | 0.0     | 0.8     | 0.7     | 0.0    | 0.2     | 1.6    | 0.4     |
| 7 to 10%           | 2.0     | 1.6     | 2.8     | 1.4    | 2.4     | 0.0    | 2.0     |
| 4 to 6%            | 8.8     | 7.9     | 8.5     | 5.6    | 8.5     | 7.9    | 8.2     |
| 1 to 3%            | 45.3    | 39.4    | 29.8    | 29.2   | 34.9    | 47.6   | 37.1    |
| <1%                | 43.9    | 50.4    | 58.2    | 63.9   | 54.0    | 42.9   | 52.4    |
| Displaced abomasum | n = 153 | n = 134 | n = 147 | n = 74 | n = 438 | n = 66 | n = 522 |
| >10%               | 0.0     | 0.8     | 0.0     | 0.0    | 0.2     | 0.0    | 0.2     |
| 7 to 10%           | 0.0     | 0.8     | 0.7     | 0.0    | 0.5     | 0.0    | 0.4     |
| 4 to 6%            | 1.3     | 1.5     | 1.4     | 4.1    | 1.8     | 1.5    | 1.7     |
| 1 to 3%            | 28.8    | 26.1    | 24.5    | 25.7   | 26.0    | 25.8   | 26.3    |
| <1%                | 69.9    | 70.9    | 73.5    | 70.3   | 71.5    | 72.7   | 71.5    |
| Grass tetany       | n = 151 | n = 131 | n = 140 | n = 71 | n = 425 | n = 65 | n = 507 |
| >10%               | 0.7     | 0.8     | 0.0     | 1.4    | 0.5     | 1.5    | 0.6     |
| 7 to 10%           | 1.3     | 0.0     | 0.0     | 0.0    | 0.2     | 1.5    | 0.4     |
| 4 to 6%            | 0.7     | 2.3     | 1.4     | 5.6    | 2.1     | 0.0    | 2.0     |
| 1 to 3%            | 11.9    | 13.0    | 16.4    | 15.5   | 14.6    | 10.8   | 14.4    |
| <1%                | 85.4    | 84.0    | 82.1    | 77.5   | 82.6    | 86.2   | 82.6    |
| Ketosis            | n = 149 | n = 130 | n = 141 | n = 72 | n = 425 | n = 66 | n = 506 |
| >10%               | 0.0     | 0.8     | 0.0     | 0.0    | 0.2     | 0.0    | 0.2     |
| 7 to 10%           | 0.7     | 0.0     | 0.0     | 0.0    | 0.0     | 1.5    | 0.2     |
| 4 to 6%            | 1.3     | 3.1     | 3.6     | 5.6    | 3.3     | 1.5    | 3.0     |
| 1 to 3%            | 25.5    | 20.0    | 25.5    | 25.0   | 22.6    | 33.3   | 23.9    |
| <1%                | 72.5    | 76.2    | 70.9    | 69.4   | 73.9    | 63.6   | 72.7    |

223 <sup>a</sup>Herds were categorized by herd size (large: >150 cows, above average: 100-150 cows, average: 60-  
224 100 cows, or small: <60 cows) based on the Irish national dairy herd average size (93 cows; [16]), and  
225 by calving pattern (spring-calving: cows calving in spring, or split-calving: cows calving in spring and  
226 autumn).

## 227 **Perceived disease importance**

228 Based on incidence and impact in their herd, most of the respondents indicated that  
229 occasional cases without major effect on herd performance were observed for milk fever  
230 and/or downer cow (73.0%; 381/522), metritis (72.2%; 374/518), ketosis (70.0%; 319/523),  
231 retained placenta (69.1%; 357/517), and displaced abomasum and/or digestive problems

232 (61.9%; 88/522). However, a noticeable proportion of the respondents indicated that milk  
233 fever was a significant (regularly treating severe cases with some cows lost/culled) or routine  
234 (regularly treating cows to control issues) problem in their herds (15.7%; 82/522). Subclinical  
235 hypocalcaemia was reported as a significant or routine problem in some herds (9.4%; 49/522),  
236 nevertheless, 20.7% (107/517) of farmers reported not knowing what subclinical  
237 hypocalcaemia was. The complete distribution of perceived disease importance as reported  
238 by herd size and calving pattern is described in S4 Table.

### 239 **Disease records**

240 Disease incidence records were kept by <55.0% of respondents for any of the evaluated  
241 conditions (Table 2). The odds of farmers from small herds reporting to keep records of  
242 metritis incidence were lower than those of farmers from large herds (OR [95% CI] = 0.35  
243 [0.14 – 0.83];  $P = 0.010$ ), while odds of reporting incidence record keeping among farmers  
244 from different herd sizes and calving patterns were similar for other conditions (Table 3).  
245 Farmers frequently reported to keep records of antibiotic treatments for displaced  
246 abomasum and/or digestive problems (54.9%; 285/519), retained placenta (50.0%; 258/516),  
247 and metritis (39.4%; 199/505; Table 2). Additionally, some farmers, reported to keep records  
248 of antibiotic treatments for metabolic conditions [i.e. milk fever (23.7%; 123/518), ketosis  
249 (23.5%; 117/498) and grass tetany (15.5%; 79/509); Table 2]. The odds of farmers from small  
250 herds reporting to keep records of antibiotic treatments for milk fever were 3 times those of  
251 farmers from large herds (OR [95% CI] = 3.2 [1.42 – 7.26];  $P < 0.001$ ), while odds were similar  
252 for farmers from average and above average compared to those of farmers from large herds  
253 (Table 3).

254 **Table 2.** Reported dairy cow peripartum condition records kept (% of respondents)

| Condition and record type | Herd size <sup>a</sup> |               |         |        | Herd calving pattern <sup>a</sup> |               |         |
|---------------------------|------------------------|---------------|---------|--------|-----------------------------------|---------------|---------|
|                           | Large                  | Above average | Average | Small  | Spring-calving                    | Split-calving | All     |
| Milk fever                | n = 153                | n = 131       | n = 145 | n = 74 | n = 430                           | n = 66        | n = 518 |
| Antibiotic treatment      | 17.6                   | 24.4          | 22.1    | 40.5   | 25.1                              | 18.2          | 23.7    |
| Supportive treatment      | 30.7                   | 29.0          | 35.9    | 35.1   | 33.5                              | 27.3          | 32.6    |
| Incidence                 | 41.2                   | 42.7          | 42.8    | 35.1   | 43.7                              | 34.8          | 41.9    |
| Retained placenta         | n = 149                | n = 133       | n = 146 | n = 73 | n = 430                           | n = 65        | n = 516 |
| Antibiotic treatment      | 48.3                   | 48.1          | 55.5    | 46.6   | 49.5                              | 55.4          | 50.0    |
| Supportive treatment      | 21.5                   | 18.8          | 22.6    | 23.3   | 21.4                              | 23.1          | 21.3    |
| Incidence                 | 49.7                   | 49.6          | 43.8    | 32.9   | 47.9                              | 43.1          | 45.9    |
| Metritis                  | n = 148                | n = 130       | n = 141 | n = 72 | n = 422                           | n = 64        | n = 505 |
| Antibiotic treatment      | 39.2                   | 39.2          | 39.0    | 40.3   | 39.1                              | 45.3          | 39.4    |
| Supportive treatment      | 14.9                   | 13.8          | 13.5    | 13.9   | 13.0                              | 17.2          | 13.9    |
| Incidence                 | 41.9                   | 30.8          | 31.2    | 19.4   | 35.5                              | 28.1          | 33.7    |
| Displaced abomasum        | n = 152                | n = 133       | n = 145 | n = 74 | n = 431                           | n = 66        | n = 519 |
| Antibiotic treatment      | 58.6                   | 53.4          | 53.1    | 55.4   | 55.2                              | 57.6          | 54.9    |
| Supportive treatment      | 9.9                    | 7.5           | 12.4    | 10.8   | 10.0                              | 10.6          | 10.0    |
| Incidence                 | 36.8                   | 33.8          | 35.2    | 31.1   | 36.2                              | 34.8          | 35.1    |
| Grass tetany              | n = 148                | n = 131       | n = 145 | n = 71 | n = 423                           | n = 65        | n = 509 |
| Antibiotic treatment      | 12.2                   | 14.5          | 17.2    | 21.1   | 15.4                              | 15.4          | 15.5    |
| Supportive treatment      | 19.6                   | 21.4          | 20.0    | 14.1   | 20.6                              | 15.4          | 19.6    |
| Incidence                 | 31.8                   | 34.4          | 28.3    | 21.1   | 32.2                              | 21.5          | 30.3    |
| Ketosis                   | n = 150                | n = 124       | n = 134 | n = 73 | n = 414                           | n = 64        | n = 498 |
| Antibiotic treatment      | 22.7                   | 22.6          | 22.4    | 31.5   | 22.9                              | 26.6          | 23.5    |
| Supportive treatment      | 18.7                   | 15.3          | 16.4    | 13.7   | 15.5                              | 18.8          | 16.3    |
| Incidence                 | 26.7                   | 25.0          | 27.6    | 24.7   | 27.8                              | 20.3          | 26.5    |

255 <sup>a</sup>Herds were categorized by herd size (large: >150 cows, above average: 100-150 cows, average: 60-  
256 100 cows, or small: <60 cows) based on the Irish national dairy herd average size (93 cows; [16]), and  
257 by calving pattern (spring-calving: cows calving in spring, or split-calving: cows calving in spring and  
258 autumn).

259 **Table 3.** Herd size odds ratios and 95% CI for responses to survey questions

| Survey question and answer <sup>a</sup> | Class contrast (Herd size/calving pattern) <sup>a</sup> | Odds ratio (95% CI) <sup>b</sup> | P-value <sup>c</sup> |
|-----------------------------------------|---------------------------------------------------------|----------------------------------|----------------------|
| Management strategy                     |                                                         |                                  |                      |
| Management in >1 group                  | Small vs. Large                                         | 0.22 (0.10, 0.50)                | <0.001               |
|                                         | Average vs. Large                                       | 0.73 (0.40, 1.33)                | 0.537                |
|                                         | Above average vs. Large                                 | 0.64 (0.40, 1.03)                | 0.249                |
| Management in >1 group                  | Split- vs. spring-calving                               | 0.51 (0.30, 0.86)                | 0.011                |
| Provide feed sources except silage      | Split- vs. spring-calving                               | 2.48 (1.46, 4.24)                | <0.001               |
| Once-a-day milking after calving        | Split- vs. spring-calving                               | 0.16 (0.07, 0.38)                | <0.001               |
| Cows indoors for a period after calving | Split- vs. spring-calving                               | 0.34 (0.20, 0.57)                | <0.001               |
| Disease treatment incidence             |                                                         |                                  |                      |
| Milk fever                              | Split- vs. spring-calving                               | 1.78 (1.02, 3.12)                | 0.042                |
| Record type                             |                                                         |                                  |                      |
| Metritis incidence                      | Small vs. Large                                         | 0.35 (0.14, 0.83)                | 0.010                |
|                                         | Average vs. Large                                       | 0.63 (0.34, 1.17)                | 0.223                |
|                                         | Above average vs. Large                                 | 0.63 (0.33, 1.20)                | 0.256                |
| Antibiotic usage for milk fever         | Small vs. Large                                         | 3.20 (1.42, 7.26)                | <0.001               |
|                                         | Average vs. Large                                       | 1.30 (0.61, 2.74)                | 0.808                |
|                                         | Above average vs. Large                                 | 1.48 (0.69, 3.13)                | 0.546                |

260 <sup>a</sup>Herds were categorized by herd size (large: >150 cows, above average: 100-150 cows, average: 60-100 cows, or small: <60 cows) based on the Irish  
 261 national dairy herd average size (93 cows; [14]), and by calving pattern (spring-calving: cows calving in spring, or split-calving: cows calving in spring and  
 262 autumn).

263 <sup>b</sup>Contrast analysed as "yes" vs. "no" except for milk fever reported treatment incidence ( $\leq 3\%$  or  $>3\%$ ).

264 <sup>c</sup>Values were adjusted using the Tukey-Kramer adjustment for multiple comparisons in the herd size model.

## 265 **Dry cow management**

266 Most commonly implemented management strategies for dry cows were body condition  
267 monitoring (73.4%; 365/497) and Mg and/or dry cow mineral supplementation in diet (61.2%;  
268 304/497; Fig 3). The least reported management strategies were feeding a low K diet (20.3%;  
269 101/497) or an acidifying diet [dietary cation-anion difference (DCAD); 6.2%; 31/497; Fig 3].  
270 Some differences on reportedly implemented management strategies by herd size and calving  
271 pattern were observed (Table 3; Fig 3). Managing dry cows in more than one group (e.g.  
272 separate groups for fat and thin cows) was less frequently reported by farmers from small  
273 than large herds (OR [95% CI] = 0.22 [0.10 – 0.50];  $P < 0.001$ ) and by farmers from split- than  
274 spring-calving herds (OR [95% CI] = 0.51 [0.30 – 0.86];  $P = 0.011$ ; Table 3). The odds of farmers  
275 from split-calving herds reporting to provide feeds other than silage to dry cows were 2.5  
276 times those of farmers from spring-calving herds (OR [95% CI] = 2.48 [1.46 – 4.24];  $P < 0.001$ ;  
277 Table 3). The full distribution of reported management strategies by herd size and calving  
278 pattern is presented in S5 Table.

279 **Fig 3. Dry cows reportedly implemented management strategies by herd size [A; large**  
280 **(>150 cows; n = 148), above average (100-150 cows; n = 129), average (60-100 cows; n =**  
281 **142) and small (<60 cows; n = 72)] and herd calving pattern [B; spring-calving (n = 428) and**  
282 **split-calving (n = 67)].**

## 283 **Fresh cow management**

284 The most commonly implemented fresh cow management strategy in relation to transition  
285 cow disease prevention was Ca supplementation at calving (60.6%; 314/487; Fig 4); of these,  
286 82.2% (258/314) reported to supplement only “high-risk” cows and 12.1% (38/314) reported  
287 to supplement all cows (18 respondents chose both options). Some differences in

288 implemented management strategies by herd size and calving pattern were observed (Table  
289 3; Fig 4). Milking cows once-a-day for a period after calving was less frequently reported to  
290 be implemented by farmers from split- calving than from spring-calving herds (OR [95% CI] =  
291 0.16 [0.07 – 0.38];  $P < 0.001$ ). Last, keeping freshly calved cows indoors for a period after  
292 calving (the overall most frequently reported management strategy; 68.0%; 331/487) was less  
293 frequently reported by farmers from split- than spring-calving herds (OR [95% CI] = 0.34 [0.20  
294 – 0.57];  $P < 0.001$ ). The full distribution of reported management strategies by herd size and  
295 calving pattern is presented in S6 Table.

296 **Fig 4. Fresh cows reportedly implemented management strategies by herd size [A: large**  
297 **(>150 cows; n = 148), above average (100-150 cows; n = 121), average (60-100 cows; n =**  
298 **136) and small (<60 cows; n = 67) and herd calving pattern [B: spring-calving (n = 416) and**  
299 **split-calving (n = 67)**

## 300 Discussion

301 A final total of 525 responses were suitable for data analysis, this represents 3.4% of Irish  
302 dairy herds (total of 15,319 dairy herds in 2022; [16]). Overall, respondents to this survey had  
303 larger herds and above average performance when compared to national averages;  
304 respondents mean herd size was 45% higher than the mean dairy herd size in the Republic of  
305 Ireland which is 93 cows [14], respondents mean 305-day milk yield and calving interval were  
306 respectively 20% higher and 3% lower than the 2022 national means (5,716 L/cow; [16]) and  
307 388 days (ICBF HerdPlus users; [16]). The apparent 'above average' profile of the respondents'  
308 herds is not surprising as this survey was distributed among Teagasc Technical Dairy Advisory  
309 clients which tend to operate at a higher standard of technical and financial performance than  
310 the overall dairy farmer population in Ireland [18]. It has to be noted that farmers chose to

311 fill in the survey, thus further potential bias exists in the sample population as farmers  
312 interested in, or who are experiencing some issues with transition cow health and  
313 management may have been more likely to answer this survey. Respondents mostly had  
314 spring-calving herds which are most commonly seen in Ireland given the seasonal grass  
315 growth (92% of dairy herds; [19]) and the majority of respondents were located in county  
316 Cork (36.0%; 147/408; Fig 1), which is the county with the highest number of dairy cows in  
317 Ireland [20].

318 Regarding the reported disease levels, a herd alarm milk fever incidence threshold of >3%  
319 (within 14 days post-calving) was described by Lean and DeGaris [17] in an Australian  
320 technical review using data from grazing and confined herds; based on this threshold, 23.0%  
321 of respondents to our survey should be seeking help in regards to milk fever prevention. The  
322 provided threshold for retained placenta in this same review (>12 hours after calving; >6%)  
323 suggests that 2.5% of respondents to our survey should be seeking help for this condition if  
324 their definition of retained placenta aligned with the one used in the review. While research  
325 on subclinical hypocalcaemia in grazing cows is limited, and a study by Hendriks et al. [24] did  
326 not detect associations between subclinical hypocalcaemia and milk yield, milk solids, body  
327 condition score (BCS), blood non-esterified fatty acids or  $\beta$ -hydroxybutyrate (BHB)  
328 concentrations in grazing cows; subclinical hypocalcaemia is a recurrent topic of research  
329 worldwide [22] suggesting that transfer (or uptake) of scientific outputs to Irish dairy farmers  
330 may be limited (21% reported to do not know what subclinical hypocalcaemia was).

331 Given the low number of farmers reporting to keep disease records, the creation and  
332 promotion of strategies to improve record-keeping on farms should be an area of focus for  
333 outreach activities. Disease incidence and treatment record-keeping is paramount in

334 identifying patterns of disease and in aiding management of a disease at herd-level [23]. Our  
335 results also suggest that inappropriate antibiotic treatment decisions for metabolic disease  
336 treatment may be made at the farm-level. In the context of confined cows where extra-label  
337 use of antibiotics in the peripartum has been described, training the farmworkers involved in  
338 administering treatments to sick cows has proved successful at increasing their knowledge on  
339 transition cow disease diagnosis and treatment, without succeeding at decreasing overall  
340 antimicrobial use on farm [24,25].

341 In terms of dry cow management strategies, the importance of optimizing body condition at  
342 calving for subsequent health and reproductive performance and Mg supplementation to  
343 reduce the risk of milk fever in grazing systems has been emphasized for decades, thus, it is  
344 not surprising that the message has reached Irish dairy farmers and these are commonly  
345 reported dry cow management strategies [26–28]. In agreement with our findings, an Irish  
346 survey by Cummins et al. [15] reported that most of the respondents to their survey (n = 262)  
347 set a target calving BCS and fed dry cow minerals. Managing cows in >1 group during the dry  
348 period was one of the most commonly reported management strategies for this period,  
349 grouping cows by BCS is recommended for optimal BCS management during the dry period  
350 and BCS monitoring was the most commonly reported strategy in this study, however, we did  
351 not enquire about the management associated with the grouping strategy.

352 Low K diets are recommended for transition cows given K's contribution to a positive DCAD  
353 ultimately interfering with calcium metabolism and its impairment of dietary Mg absorption,  
354 and negative DCAD diets have solidly proven successful for milk fever prevention in confined  
355 cows [29,30]. The high K concentration and DCAD in pasture have been described as limiting  
356 factors for the implementation of these strategies in grazing systems [8]. Research in grazing



357 cows reports no association between positive DCAD (350 to 535 mEq/kg DM) and high K  
358 concentration (3.3 to 4.2% of DM) in pasture and plasma Ca concentration at calving,  
359 suggesting that these factors may not be **key determinants** of milk fever risk in grazing cows  
360 [8,31]. Nevertheless, K concentrations in Irish grass silage may not be as high as those  
361 reported from pasture in New Zealand's studies (mean [range] = 2.4% [0.6 to 5.6%] of DM; n  
362 = 1,636 samples; [32]); and thus opting for a low K grass silage or achieving a lower DCAD  
363 through the addition of anionic salts may be management strategies more suitable for dry  
364 cow feeding in the Irish dairy production system than in other grazing systems. Therefore,  
365 further research is needed to understand the limited uptake and to identify the barriers for  
366 the adoption and implementation of these research-supported strategies for milk fever  
367 prevention by Irish dairy farmers.

368 The most reported fresh cow strategy was keeping cows indoors for a period postpartum, a  
369 practice more commonly implemented in spring-calving dairy herds. This strategy is most  
370 likely implemented due to excessive soil moisture during the first months of the spring calving  
371 season (January and February; [33]) rather than by a transition cow health improvement  
372 desire. Split-calving herds use a lower amount of grazed grass in their cows diet potentially  
373 explaining the lower implementation among these farmers [34]. Calcium supplementation at  
374 calving was the next most commonly reported strategy that could be associated with a  
375 transition cow health improvement desire; this practice is regarded as a prophylactic strategy  
376 for hypocalcaemia, effective at temporarily increasing blood Ca concentration and leading to  
377 positive performance effects on subpopulations of animals [35]. Within this survey question,  
378 answers of supplementing "high-risk cows" and supplementing "all cows" at calving were  
379 combined; we did not ask farmers to outline their definition of a "high-risk" cow or their  
380 supplementation protocol, both of which are paramount in reaping the benefits of this

381 management strategy according to research conducted in confined cows. To the best of our  
382 knowledge, only two studies by the same authors have evaluated Ca supplementation at  
383 calving, choosing an oral form, in commercial Irish dairy farms; the first one (n = 91 cows)  
384 reporting a decrease in milk BHB concentration at days 14 and 28 post-partum and 1.3 kg/d  
385 higher milk yields up to 90 days in milk for supplemented multiparous cows, and the second  
386 one (n = 103 cows) reporting a decrease in milk BHB concentration at days 14 and 21 post-  
387 partum but no effect in production performance for supplemented multiparous cows [36,37].  
388 Further research evaluating Ca supplementation strategies in the Irish dairy production  
389 context is warranted to optimise this commonly implemented strategy. Once-a-day milking  
390 was the third most popularly reported fresh period management strategy, this practice  
391 enables labour savings [38], and may reduce metabolite and mineral imbalances in early  
392 lactation and improve return to cyclicity after calving [39–41]; nevertheless our study did not  
393 enquire about the reasons behind the reported management strategies.

## 394 **Conclusions**

395 Results from the present study suggest that milk fever is a transition cow health concern in  
396 Irish dairy farms. Optimization of commonly implemented dry cow (Mg and/or dry cow  
397 mineral supplementation) and fresh cow (Ca supplementation at calving) management  
398 strategies, as well as enhanced uptake of dry cow management strategies proven successful  
399 under other production systems (low K and negative DCAD diet) may help reduce milk fever's  
400 burden on Irish dairy farms. Further research should identify the factors limiting the  
401 effectiveness of implemented management strategies and the end user adoption of  
402 successful management strategies for milk fever prevention. Additionally, dissemination  
403 activities targeting farmers from all herd sizes would be beneficial to increase awareness of

404 peripartum metabolic diseases and their recommended treatment, as well as to promote  
405 disease incidence and treatment record keeping.

## 406 **Acknowledgements**

407 The authors are especially thankful to the farmers who responded to this survey. And to J.  
408 Mason (Teagasc, Animal and Grassland Research and Innovation Centre, Moorepark, Fermoy,  
409 Ireland) for her work compiling herd-level information.

## 410 **References**

- 411 1. Roche JR, Bell AW, Overton TR, Loor JJ. Nutritional management of the transition cow  
412 in the 21st century—a paradigm shift in thinking. *Anim Prod Sci.* 2013;53: 1000–1023.  
413 doi:10.1071/AN12293.
- 414 2. Kay JK, Loor JJ, Heiser A, McGowan J, Roche JR. Managing the grazing dairy cow through  
415 the transition period: a review. *Anim Prod Sci.* 2015;55: 936. doi:10.1071/AN14870.
- 416 3. Mulligan FJ, Doherty ML. Production diseases of the transition cow. *Vet J.* 2008;176: 3–  
417 9.
- 418 4. Spaans OK, Kuhn-Sherlock B, Hickey A, Crookenden MA, Heiser A, Burke CR, et al.  
419 Temporal profiles describing markers of inflammation and metabolism during the  
420 transition period of pasture-based, seasonal-calving dairy cows. *J Dairy Sci.* 2022;105:  
421 2669–2698.
- 422 5. Lange J, McCarthy A, Kay J, Meier S, Walker C, Crookenden MA, et al. Prepartum  
423 feeding level and body condition score affect immunological performance in grazing  
424 dairy cows during the transition period. *J Dairy Sci.* 2016;99: 2329–2338. doi:

425 10.3168/jds.2015-10135.

426 6. Roche JR, Meier S, Heiser A, Mitchell MD, Walker CG, Crookenden MA, et al. Effects of  
427 precalving body condition score and prepartum feeding level on production,  
428 reproduction, and health parameters in pasture-based transition dairy cows. *J Dairy*  
429 *Sci.* 2015;98: 7164–7182. doi:10.3168/jds.2014-9269.

430 7. Mills KE, Weary DM, von Keyserlingk MAG. Identifying barriers to successful dairy cow  
431 transition management. *J Dairy Sci.* 2020;103: 1749–1758. doi:10.3168/jds.2018-  
432 16231.

433 8. Roche J. Transition Management in Grazing Systems: Pragmatism Before Precision. *Vet*  
434 *Clin North Am Food Anim Pract.* 2023;39: 325–336. doi:10.1016/j.cvfa.2023.02.005.

435 9. Aubé L, Mialon MM, Mollaret E, Mounier L, Veissier I, de Boyer des Roches A. Review:  
436 Assessment of dairy cow welfare at pasture: measures available, gaps to address, and  
437 pathways to development of ad-hoc protocols. *Animal.* 2022;16: 100597.  
438 doi:10.1016/j.animal.2022.100597.

439 10. United States Department of Agriculture. National Animal Health Monitoring System  
440 (NAHMS). 2014. Dairy cattle management practices in the United States. 2014.

441 11. Daros RR, Hötzel MJ, Bran JA, LeBlanc SJ, von Keyserlingk MAG. Prevalence and risk  
442 factors for transition period diseases in grazing dairy cows in Brazil. *Prev Vet Med.*  
443 2017;145: 16–22. doi:10.1016/j.prevetmed.2017.06.004.

444 12. Fujiwara M, Haskell MJ, Macrae AI, Rutherford KMD. Survey of dry cow management  
445 on UK commercial dairy farms. *Vet Rec.* 2018;183: 297. doi:10.1136/vr.104755.

446 13. Cummins C, Berry DP, Sayers R, Lorenz I, Kennedy E. Questionnaire identifying

- 447 management practices surrounding calving on spring-calving dairy farms and their  
448 associations with herd size and herd expansion. *Animal*. 2016;10: 868–877.  
449 doi:10.1017/S1751731116000124.
- 450 14. Dillon E, Donnellan T, Moran B, Lennon J. Teagasc National Farm Survey 2022  
451 Preliminary Results. 2023 [cited 10 Dec 2023]. Available from:  
452 [https://www.teagasc.ie/media/website/publications/2023/NFS\\_prelim\\_results\\_2022.](https://www.teagasc.ie/media/website/publications/2023/NFS_prelim_results_2022.pdf)  
453 pdf.
- 454 15. Xu Y, Pace S, Kim J, Iachini A, King LB, Harrison T, et al. Threats to online surveys:  
455 Recognizing, detecting, and preventing survey bots. *Soc Work Res*. 2022;46: 343–350.  
456 doi:10.1093/swr/svac023.
- 457 16. ICBF. HerdPlus Dairy Calving Statistics 2022. 2022 [cited 13 May 2024]. Available from:  
458 <https://www.icbf.com/herdplus-dairy-calving-statistics-2022/>.
- 459 17. Lean I, DeGaris P. Transition cow management a technical review for nutritional  
460 professionals, veterinarians and farm advisers. 2021. [cited 10 Dec 2023]. Available  
461 from:  
462 [https://www.researchgate.net/publication/350850407\\_transition\\_cow\\_management](https://www.researchgate.net/publication/350850407_transition_cow_management_a_technical_review_for_nutritional_professionals_veterinarians_and_farm_advisers_transition_period_mating_mid-late_lactation_Dry_period_Calving_Publisher_Dairy_Australia)  
463 [\\_a\\_technical\\_review\\_for\\_nutritional\\_professionals\\_veterinarians\\_and\\_farm\\_advisers](https://www.researchgate.net/publication/350850407_transition_cow_management_a_technical_review_for_nutritional_professionals_veterinarians_and_farm_advisers_transition_period_mating_mid-late_lactation_Dry_period_Calving_Publisher_Dairy_Australia)  
464 [\\_transition\\_period\\_mating\\_mid-](https://www.researchgate.net/publication/350850407_transition_cow_management_a_technical_review_for_nutritional_professionals_veterinarians_and_farm_advisers_transition_period_mating_mid-late_lactation_Dry_period_Calving_Publisher_Dairy_Australia)  
465 [late\\_lactation\\_Dry\\_period\\_Calving\\_Publisher\\_Dairy\\_Australia](https://www.researchgate.net/publication/350850407_transition_cow_management_a_technical_review_for_nutritional_professionals_veterinarians_and_farm_advisers_transition_period_mating_mid-late_lactation_Dry_period_Calving_Publisher_Dairy_Australia).
- 466 18. Bogue P. Impact of participation in Teagasc dairy discussion groups. 2013 [cited 1 Mar  
467 2024]. Available from:  
468 [https://www.teagasc.ie/media/website/publications/2013/Discussion\\_Group\\_Report](https://www.teagasc.ie/media/website/publications/2013/Discussion_Group_Report)

469        \_Web\_Jan2013.pdf.

470    19.   National Milk Agency. National Milk Agency Annual Report & Accounts 2022. 2022  
471        [cited 1 Mar 2023]. Available from: [https://nationalmilkagency.ie/wp-](https://nationalmilkagency.ie/wp-content/uploads/2023/07/NMA-Annual-Report-2022.pdf)  
472        content/uploads/2023/07/NMA-Annual-Report-2022.pdf.

473    20.   Central Statistics Office. Dairy Farming. 2020 [cited 2 Nov 2023]. Available from:  
474        [https://www.cso.ie/en/releasesandpublications/ep/p-](https://www.cso.ie/en/releasesandpublications/ep/p-syi/statisticalyearbookofireland2021part3/agri/dairyfarming/)  
475        syi/statisticalyearbookofireland2021part3/agri/dairyfarming/.

476    21.   Hendriks SJ, Huzzey JM, Kuhn-Sherlock B, Turner S-A, Mueller KR, Phyn CVC, et al.  
477        Associations between lying behavior and activity and hypocalcemia in grazing dairy  
478        cows during the transition period. *J Dairy Sci.* 2020;103: 10530–10546.  
479        doi:10.3168/jds.2019-18111.

480    22.   Couto Serrenho R, DeVries TJ, Duffield TF, LeBlanc SJ. Graduate Student Literature  
481        Review: What do we know about the effects of clinical and subclinical hypocalcemia on  
482        health and performance of dairy cows? *J Dairy Sci.* 2021;104: 6304–6326.  
483        doi:10.3168/jds.2020-19371.

484    23.   Rhoda DA, Pantoja JCF. Using mastitis records and somatic cell count data. *Vet Clin*  
485        North Am Food Anim Pract. 2012;28: 347–361. doi:10.1016/j.cvfa.2012.03.012.

486    24.   Silva-del-Río N, Valldecabres A, Espadamala A, García-Muñoz A, Pallares P, Lago A, et  
487        al. Treatment practices after calving-related events on 45 dairy farms in California. *J*  
488        Dairy Sci. 2021;104: 12164–12172. doi:10.3168/jds.2021-20593.

489    25.   Garzon A, Portillo R, Habing G, Silva-del-Rio N, Karle BM, Pereira R V. Antimicrobial  
490        stewardship on the dairy: Evaluating an on-farm framework for training farmworkers.

- 491 J Dairy Sci. 2023;106: 4171–4183. doi: 10.3168/jds.2022-22560.
- 492 26. Roche JR, Macdonald KA, Burke CR, Lee JM, Berry DP. Associations among body  
493 condition score, body weight, and reproductive performance in seasonal-calving dairy  
494 cattle. J Dairy Sci. 2007;90: 376–391. doi:10.3168/jds.S0022-0302(07)72639-5.
- 495 27. Roche JR, Kay JK, Friggens NC, Loor JJ, Berry DP. Assessing and managing body condition  
496 score for the prevention of metabolic disease in dairy cows. Vet Clin North Am - Food  
497 Anim Pract. 2013;29: 323–336. doi:10.1016/j.cvfa.2013.03.003.
- 498 28. Lean IJ, DeGaris PJ, McNeil DM, Block E. Hypocalcemia in Dairy Cows: Meta-analysis  
499 and Dietary Cation Anion Difference Theory Revisited. J Dairy Sci. 2006;89: 669–684.  
500 doi:10.3168/jds.S0022-0302(06)72130-0.
- 501 29. National Academies of Sciences, Engineering and Medicine. Energy. In: Nutrient  
502 Requirements of Dairy Cattle. Eighth Revised Edition. Washington, DC: The National  
503 Academies Press; 2021. p. 32.
- 504 30. Santos JEP, Lean IJ, Golder H, Block E. Meta-analysis of the effects of prepartum dietary  
505 cation-anion difference on performance and health of dairy cows. J Dairy Sci. 2019;102:  
506 2134–2154. doi:10.3168/jds.2018-14628.
- 507 31. Roche JR, Morton J, Kolver ES. Sulfur and Chlorine Play a Non-Acid Base Role in  
508 Periparturient Calcium Homeostasis. J Dairy Sci. 2002;85: 3444–3453. doi:  
509 10.3168/jds.S0022-0302(02)74432-9.
- 510 32. Rogers P, Murphy W. Levels of dry matter, major elements (calcium, magnesium,  
511 nitrogen, phosphorus, potassium, sodium and sulphur) and trace elements (cobalt,  
512 copper, iodine, manganese, molybdenum, selenium and zinc) in Irish grass, silage and

- 513 hay. 2000 [cited 27 Feb 2024]. Available from:  
514 <http://homepage.tinet.ie/~progers/0forage.htm>.
- 515 33. Schulte RPO, Diamond J, Finkle K, Holden NM, Brereton AJ. Predicting the soil  
516 moisture conditions of Irish grasslands. *Irish J Agric Food Res.* 2005;44: 95–110. doi:  
517 10.1017/S0021859613000397.
- 518 34. Geary U, Lopez-Villalobos N, Garrick DJ, Shalloo L. Spring calving versus split calving:  
519 effects on farm, processor and industry profitability for the Irish dairy industry. *J Agric*  
520 *Sci.* 2014;152: 448–463. doi:10.1017/S0021859613000397.
- 521 35. Valdecabres A, Branco-Lopes R, Bernal-Córdoba C, Silva-del-Río N. Production and  
522 reproduction responses for dairy cattle supplemented with oral calcium bolus after  
523 calving: Systematic review and meta-analysis. *JDS Commun.* 2023;4: 9–13.  
524 doi:10.3168/jdsc.2022-0235.
- 525 36. Lawlor J, Fahey A, Neville E, Stack A, Mulligan F. Effect of Cow Start Calcium Bolus on  
526 Metabolic Status and Milk Production in Early Lactation. *Anim Vet Sci.* 2020;8: 124.  
527 doi:10.11648/j.av.s.20200806.12.
- 528 37. Lawlor J, Fahey A, Neville E, Stack A, Mulligan F. On-farm Safety and Efficacy Trial of  
529 Cow Start Calcium Bolus. *Anim Vet Sci.* 2019;7: 121–126.  
530 doi:10.11648/j.av.s.20190706.11.
- 531 38. Murphy JP, O'Donovan M, McCarthy K, Delaby L, Sugrue K, Galvin N, et al. A three-year  
532 comparison of once-a-day and twice-a-day milking in seasonal-calving pasture-based  
533 systems. *J Dairy Sci.* 2023;106: 8910–8925. doi:10.3168/jds.2023-23379.
- 534 39. Patton J, Kenny DA, Mee JF, O'Mara FP, Wathes DC, Cook M, et al. Effect of milking



- 535 frequency and diet on milk production, energy balance, and reproduction in dairy cows.  
536 J Dairy Sci. 2006;89: 1478–1487. doi:10.3168/jds.S0022-0302(06)72215-9.
- 537 40. Loisel MC, Ster C, Talbot BG, Zhao X, Wagner GF, Boisclair YR, et al. Impact of  
538 postpartum milking frequency on the immune system and the blood metabolite  
539 concentration of dairy cows. J Dairy Sci. 2009;92: 1900–1912. doi:10.3168/jds.2008-  
540 1399.
- 541 41. Valldecabres A, Lopes RB, Lago A, Blanc C, Silva-del-Río N. Effects of postpartum milking  
542 strategy on plasma mineral concentrations and colostrum, transition milk, and milk  
543 yield and composition in multiparous dairy cows. J Dairy Sci. 2022;105: 595–608.  
544 doi:10.3168/jds.2021-20590.

545

## 546 **Supporting information**

547 **S1 Table. Transition cow health and management questions sent in a survey via text**  
548 **message to 3 899 Teagasc (Agriculture and Food Development Authority in the Republic of**  
549 **Ireland) dairy advisory clients in October 2022. The survey was made using Survey Monkey**  
550 **(SurveyMonkey Inc., Palo Alto, CA) but has been presented here in table format.**

551 **S2 Table. Dairy cow herd descriptions for survey respondents with an active ICBF (Irish**  
552 **Cattle Breeding Federation) account by herd size and calving pattern.** <sup>a</sup>Herds were  
553 categorized by herd size (large: >150 cows, above average: 100-150 cows, average: 60-100  
554 cows, or small: <60 cows) using the Irish national dairy herd average as reference (93 cows;  
555 Dillon et al., 2023), and by calving pattern (spring-calving: cows calving in spring, or split-  
556 calving: cows calving in spring and autumn). <sup>b</sup>IQR = Interquartile range.

557 **S3 Table. Reported highest observed disease incidence by cow parity, stage of lactation and**  
558 **stage of calving season presented by herd size and calving pattern (% of respondents).**  
559 <sup>a</sup>Herds were categorized by herd size (large: >150 cows, above average: 100-150 cows,  
560 average: 60-100 cows, or small: <60 cows) using the Irish national dairy herd average as  
561 reference (93 cows; Dillon et al., 2023), and by calving pattern (spring-calving: cows calving in  
562 spring, or split-calving: cows calving in spring and autumn). <sup>b</sup>Stages of lactation: Fresh calver:  
563 First 3 weeks after calving, early lactation: from week 3 to end of 3<sup>rd</sup> month of lactation, mid  
564 lactation: from start of 4<sup>th</sup> month to end of 7<sup>th</sup> month of lactation, late lactation: from start of  
565 8<sup>th</sup> month of lactation to dry-off, far-off dry: from dry-off to close-up, close-up dry: last 3  
566 weeks of pregnancy.

567 **S4 Table. Reported perception of dairy cow diseases by herd size and calving pattern.**  
568 **Perception was based on treatments, mortality, culling and herd performance (% of**  
569 **respondents).** <sup>a</sup>Herds were categorized by herd size (large: >150 cows, above average: 100-  
570 150 cows, average: 60-100 cows, or small: <60 cows) using the Irish national dairy herd  
571 average as reference (93 cows; Dillon et al., 2023), and by calving pattern (spring-calving:  
572 cows calving in spring, or split-calving: cows calving in spring and autumn). <sup>b</sup>Perception  
573 definitions: Significant problem (regularly treating severe cases with some cows lost/culled),  
574 routine problem (regularly treating cows to control issues), occasional cases (but no major  
575 effect on herd performance)

576 **S5 Table. Reported dry cow management strategies by herd size and calving pattern (% of**  
577 **respondents).** <sup>a</sup>Herds were categorized by herd size (large: >150 cows, above average: 100-  
578 150 cows, average: 60-100 cows, or small: <60 cows) using the Irish national dairy herd  
579 average as reference (93 cows; Dillon et al., 2023), and by calving pattern (spring-calving:  
580 cows calving in spring, or split-calving: cows calving in spring and autumn). <sup>b</sup>DCAD = Dietary  
581 cation anion difference.

582 **S6 Table. Reported fresh cow management strategies by herd size and calving pattern (% of**  
583 **respondents).** <sup>a</sup>Herds were categorized by herd size (large: >150 cows, above average: 100-  
584 150 cows, average: 60-100 cows, or small: <60 cows) using the Irish national dairy herd  
585 average as reference (93 cows; Dillon et al., 2023), and by calving pattern (spring-calving:  
586 cows calving in spring, or split-calving: cows calving in spring and autumn)

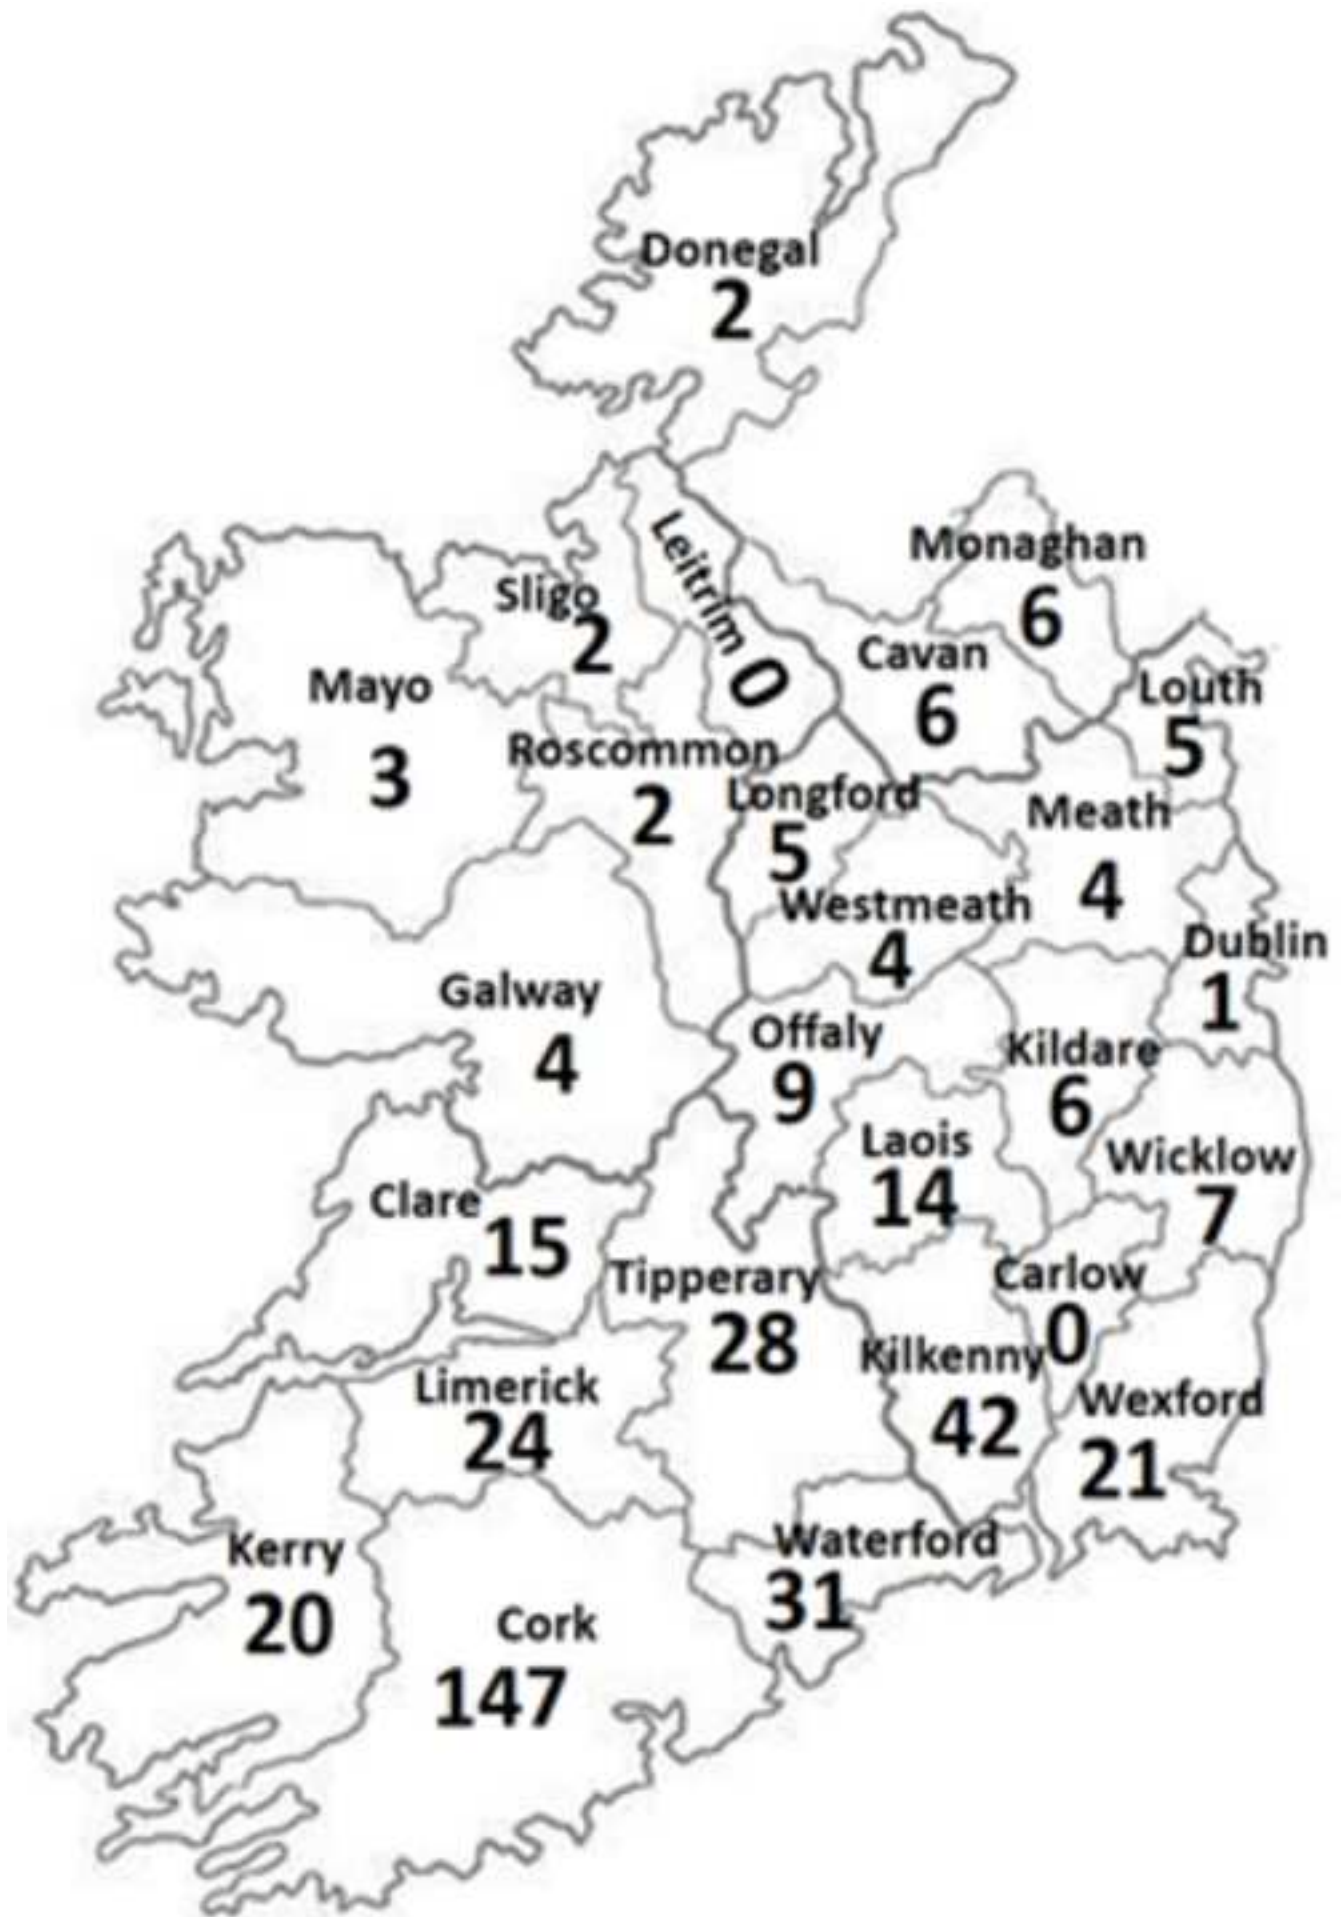

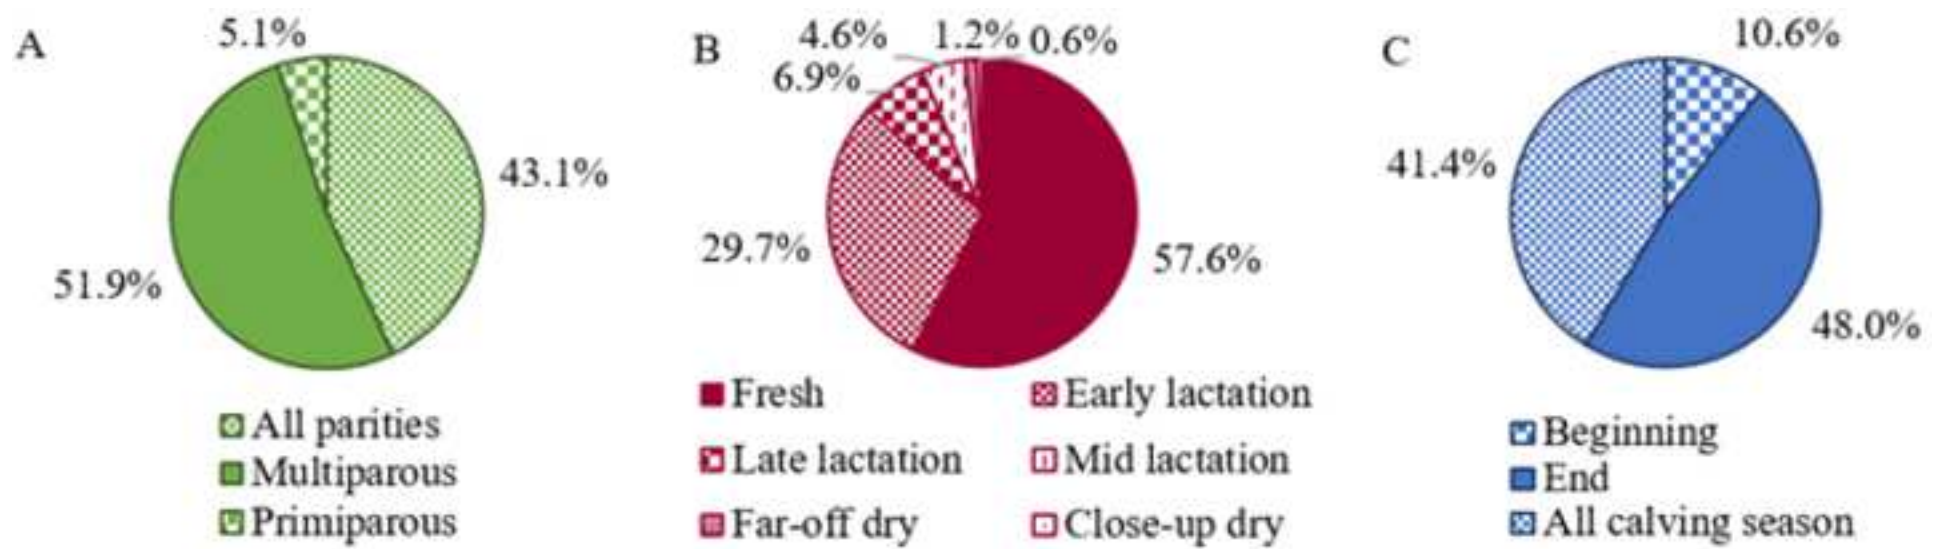

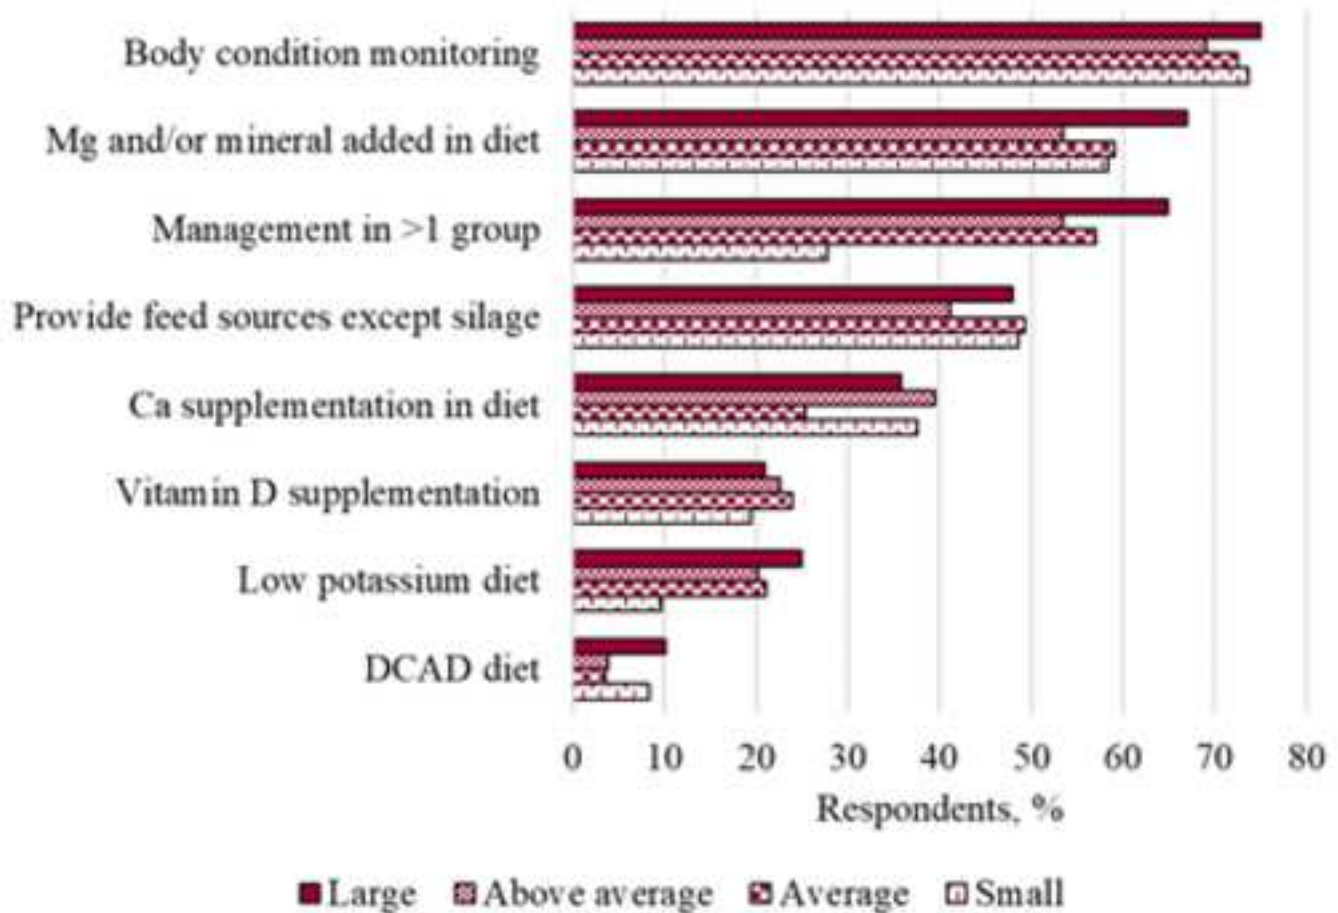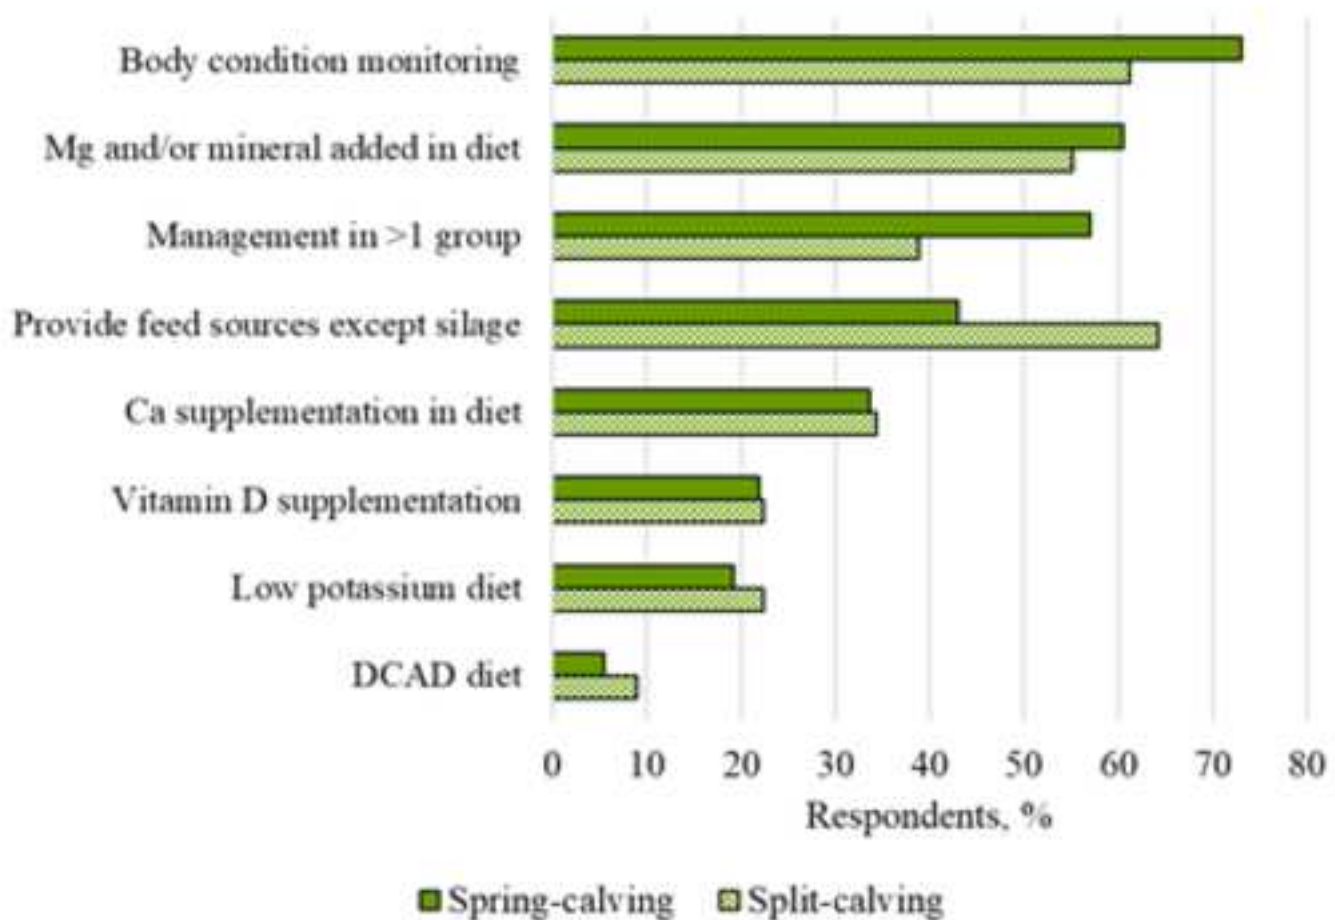

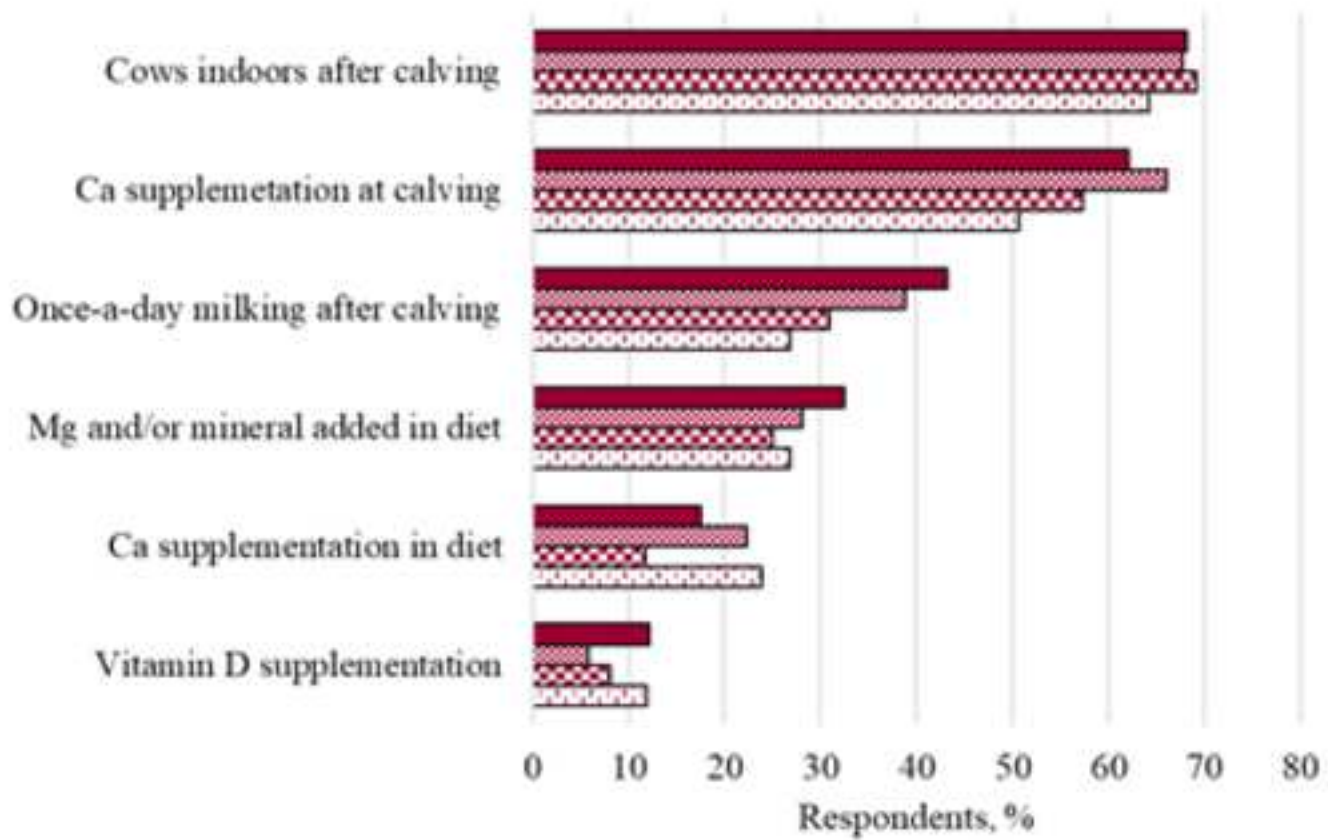

■ Large ■ Above average ■ Average □ Small

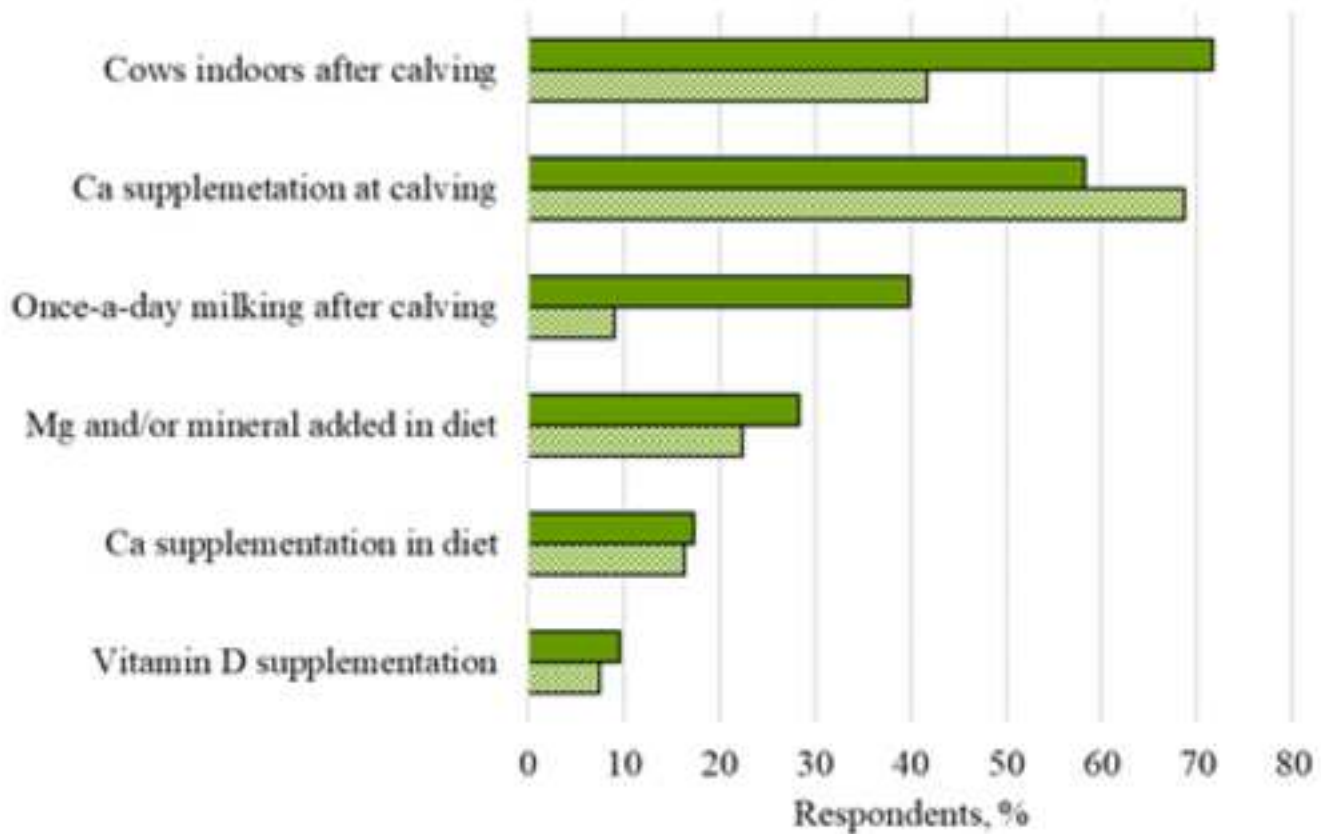

■ Spring-calving ■ Split-calving

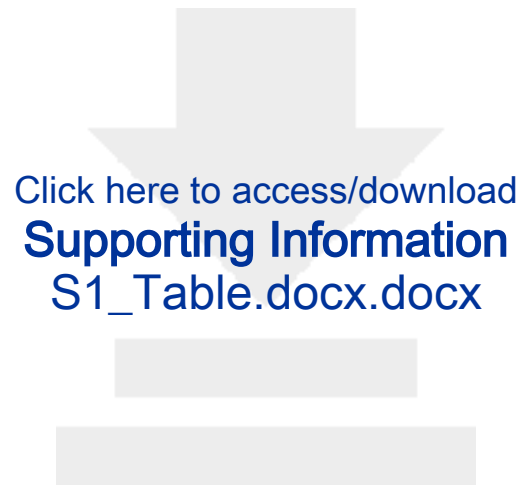

Click here to access/download  
**Supporting Information**  
S1\_Table.docx.docx



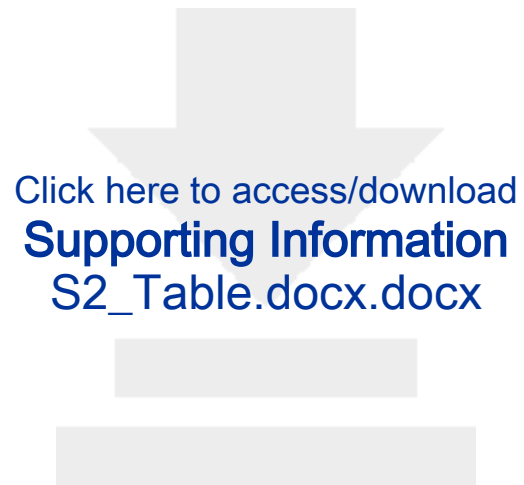

Click here to access/download  
**Supporting Information**  
S2\_Table.docx.docx

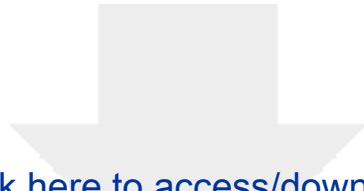

Click here to access/download  
**Supporting Information**  
S3\_Table.docx.docx

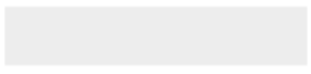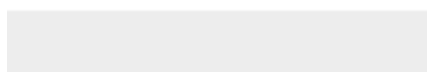

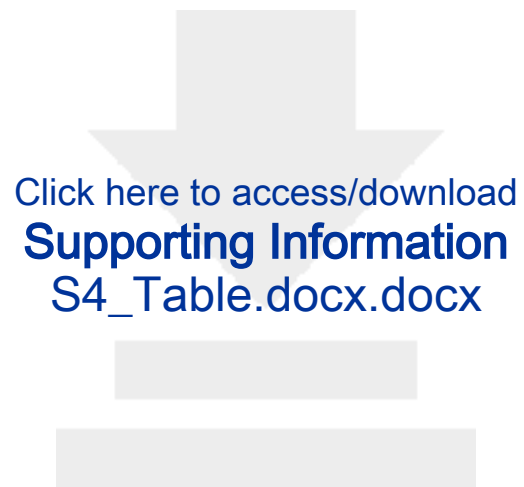

Click here to access/download  
**Supporting Information**  
S4\_Table.docx.docx

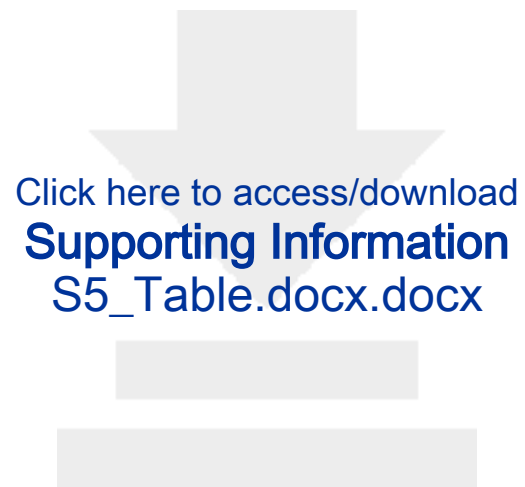

Click here to access/download  
**Supporting Information**  
S5\_Table.docx.docx

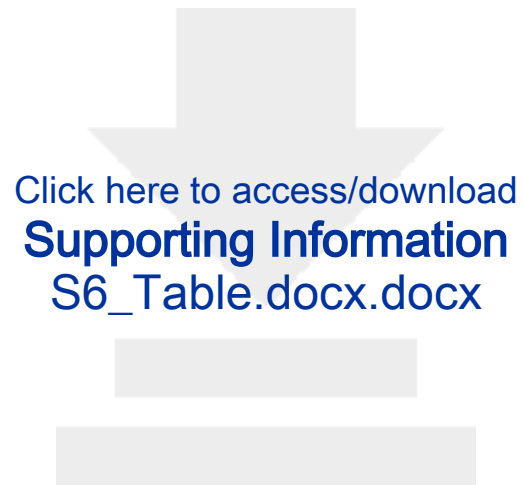

Click here to access/download  
**Supporting Information**  
S6\_Table.docx.docx
